# Supplementary material for: Excellent cryogenic optical thermometry based on green up-conversion of Ho3+-doped perovskite Na0.5Bi0.5TiO3 ceramics
Source: Royal Society of Chemistry journal article supplement (doi:10.1039/d0tc04906a), 2020-12-10
Supplement: d0tc04906a1.pdf [file d0tc04906a1.pdf]

Supporting information

**Excellent cryogenic optical thermometry of green up-conversion  
in Ho<sup>3+</sup>-doped perovskite Na<sub>0.5</sub>Bi<sub>0.5</sub>TiO<sub>3</sub> ceramics**

Yuzhen Wang<sup>1</sup>, Yanan Wang<sup>1,3</sup>, Chaoyang Ma<sup>2,□</sup>, Zhe Feng<sup>1</sup>, Chuandong Zuo<sup>1</sup>,  
Wanggui Ye<sup>1</sup>, Chong Zhao<sup>1</sup>, Yanbin Li<sup>1</sup>, Zicheng Wen<sup>2,4</sup>, Zhiquan Cao<sup>5</sup>, Zhijun  
Cao<sup>6</sup>, Xiaofei Shen<sup>2</sup>, Chong Wang<sup>2</sup>, Yingkui Li<sup>2</sup>, Xuanyi Yuan<sup>1</sup>, Yongge Cao<sup>2,4, □</sup>

<sup>1</sup> Department of Physics, Renmin University of China, Beijing, 100872, China

<sup>2</sup> Songshan Lake Materials Laboratory, Dongguan, Guangdong, 523808, China

<sup>3</sup> Beijing National Laboratory for Condensed Matter Physics and Institute of  
Physics, Chinese Academy of Sciences, Beijing 100190, China

<sup>4</sup> Institute of Physics, Chinese Academy of Sciences, Beijing 100190, China

<sup>5</sup> New York University, New York, NY 10003, USA

<sup>6</sup> University of Virginia, Charlottesville, VA 22904, USA

□ Corresponding authors: [machaoyang@sslslab.org.cn](mailto:machaoyang@sslslab.org.cn)

[caoyongge@sslslab.org.cn](mailto:caoyongge@sslslab.org.cn)

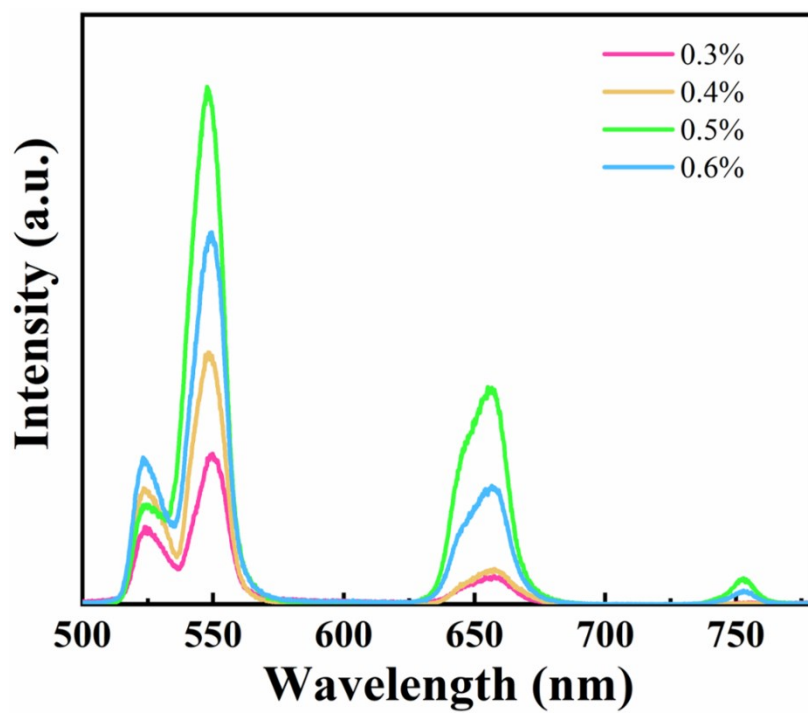

Fig. S1 UCPL of Na<sub>0.5</sub>Bi<sub>0.5</sub>TiO<sub>3</sub>: *x* at% Ho (*x*=0.3, 0.4, 0.5, 0.6) samples.

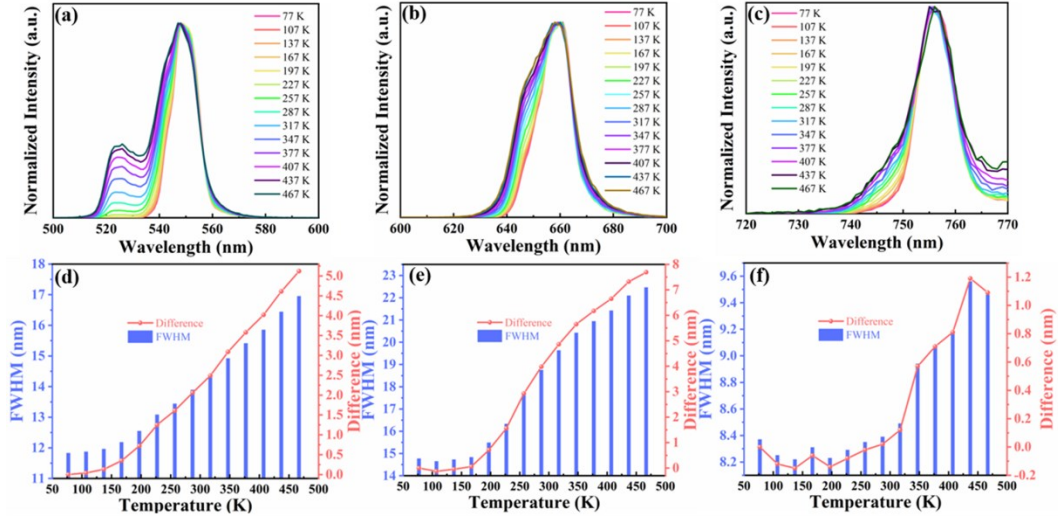

Fig. S2 Normalized up-conversion emission at (a) 548 nm, (b) 654 nm and (c) 753 nm for Ho<sup>3+</sup> single-doped NBT: Ho sample under various temperatures. The temperature-dependent FWHM and its difference based on 77 K for emission at (d) 548 nm, (e) 654 nm and (f) 753 nm.

As we can see, all the emission peaks generally become widening along with temperature increasing on the whole. This can be interpreted by using Boltzmann distribution (F. Wang, et al. RSC Advances 7, (2017) 27422.):

$$FWHM(T) = W_0 \times \sqrt{\coth \frac{hv}{2kT}}$$

$$W_0 = \sqrt{8 \ln 2} \times hv \times \sqrt{s}$$

where  $W_0$  is the FWHM at 0 K,  $hv$  is the vibrational phonon energy.  $s$  and  $k$  are Huang-Rhys parameter and the Boltzmann constant, respectively. As the temperature rises, the electron phonon interaction is enhanced and the excited electrons extend to higher energy levels, thus increasing the transition of electrons from different energy levels, and resulting in the increase of FWHM.

Table S1 The energy gaps of <sup>5</sup>F<sub>4</sub> and <sup>5</sup>S<sub>2</sub> levels of Ho<sup>3+</sup>-doped different host materials.

| Chemical composition                                                                                         | Wavelength      | $\Delta E(\text{cm}^{-1})$ | Ref |
|--------------------------------------------------------------------------------------------------------------|-----------------|----------------------------|-----|
| $\text{Ca}_x(\text{LiHo})_{x/2}\text{Bi}_4\text{Ti}_4\text{O}_{15}(0 \leq x \leq 1.0)$                       | 530 nm / 545 nm |                            | 27  |
| $(\text{K}_{0.47}\text{Na}_{0.47}\text{Li}_{0.06})(\text{Nb}_{0.94}\text{Bi}_{0.06})\text{O}_3:0.5\text{Ho}$ | 526 nm / 552 nm | 613                        | 28  |
| $(\text{K}_{0.47}\text{Na}_{0.47}\text{Li}_{0.06})(\text{Nb}_{0.94}\text{Bi}_{0.06})\text{O}_3:1.0\text{Ho}$ | 526 nm / 552 nm | 650                        |     |

|                                                                                          |                       |                |                  |
|------------------------------------------------------------------------------------------|-----------------------|----------------|------------------|
| 0.9(K <sub>0.5</sub> Na <sub>0.5</sub> )NbO <sub>3</sub> -0.1SrTiO <sub>3</sub> :0.005Ho | 523 nm /551 nm        | 846.63         | 29               |
| 0.9(K <sub>0.5</sub> Na <sub>0.5</sub> )NbO <sub>3</sub> -0.1SrTiO <sub>3</sub> :0.01Ho  | 523 nm /551 nm        | 776.56         |                  |
| ZrO <sub>2</sub> :Ho                                                                     | 540 nm /550 nm        |                | 30               |
| BaTiO <sub>3</sub> -Na <sub>0.5</sub> Ho <sub>0.5</sub> TiO <sub>3</sub>                 | 523 nm /553 nm        | 933.83         | 41               |
| <b>Na<sub>0.5</sub>Bi<sub>0.5</sub>TiO<sub>3</sub>:0.005Ho</b>                           | <b>525 nm /548 nm</b> | <b>1023.74</b> | <b>This work</b> |

---
